1 **BITC induces cardiomyocyte proliferation and heart regeneration**

2  
3 Akane Sakaguchi<sup>1</sup>, Miwa Kawasaki<sup>1</sup>, Kozue Murata<sup>1,3</sup>, Hidetoshi Masumoto<sup>1,2</sup> and Wataru Kimura<sup>1</sup>  
4 #

5  
6 1: RIKEN Center for Biosystems Dynamics Research, Minatojima-Minamimachi 2-2-3, Chuo-ku,  
7 Kobe, Hyogo, Japan 650-0047

8 2: Department of Cardiovascular Surgery, Graduate School of Medicine, Kyoto University

9 3: Institute for Advancement of Clinical and Translational Science, Kyoto University Hospital

10  
11 #email: [wataru.kimura@riken.jp](mailto:wataru.kimura@riken.jp)

12  
13 **Abstract**

14 Mammalian cardiomyocytes have the ability to proliferate from the embryonic stage until early  
15 neonatal stage, with most of them being arrested from the cell cycle shortly after birth. Therefore,  
16 adult mammalian heart cannot regenerate myocardial injury. Despite much attention,  
17 pharmacological approaches for the induction of cardiomyocyte proliferation and heart regeneration  
18 have yet to be successful. To induce cardiomyocyte proliferation by drug administration, we focused  
19 on benzyl isothiocyanate (BITC). Firstly, we showed that BITC induces cardiomyocyte proliferation  
20 both in vitro and in vivo through the activation of the cyclin-dependent kinase (CDK) pathway. In  
21 addition, we demonstrated that BITC treatment induces heart regeneration in the infarcted neonatal  
22 heart even after the regeneration period. Furthermore, we administered BITC to adult mice in  
23 parallel with mild hypoxia (10% O<sub>2</sub>) treatment and showed that a combination of BITC  
24 administration and mild hypoxia exposure induces cell cycle reentry in the adult heart. The present  
25 study suggests that pharmacological activation of the CDK pathway with BITC concurrently with  
26 the activation of hypoxia-related signaling pathways may enable researchers to establish a novel  
27 strategy to induce cardiac regeneration in patients with heart disease.

28  
29 **Main**

30 Mammalian cardiomyocytes have the ability to proliferate from the embryonic stage until early  
31 neonatal stage, with most of them being arrested from the cell cycle shortly after birth<sup>1</sup>. Therefore,  
32 adult mammalian heart cannot regenerate myocardial injury, resulting in the fact that ischemic heart  
33 disease is the biggest cause of death in the world. As such, enhancement of cell cycle reentry for  
34 endogenous cardiomyocytes is of great interest for the replacement of the injured fibrotic scar tissue  
35 with healthy myocardium<sup>2</sup>. However, despite much attention, pharmacological approaches for the  
36 induction of cardiomyocyte proliferation and heart regeneration have yet to be successful.

37 To induce cardiomyocyte proliferation by drug administration, we focused on benzyl  
38 isothiocyanate (BITC), which is known to regulate the cell cycle in a dose-dependent manner<sup>3</sup>. First,  
39 we subcutaneously administered 20 mg/kg/day of BITC to neonatal mice from postnatal day 0 (P0)  
40 to P6, and examined the number of proliferating cardiomyocytes at P7. The number of  
41 phosphorylated histone H3 (pH3)-positive cardiomyocytes was significantly increased at P7 in the  
42 BITC-treated mice compared with control DMSO-treated ones (Figure A). Interestingly,  
43 cardiomyocyte proliferation did not change upon treatment with 50 or 100 mg/kg/day of BITC (data  
44 not shown), suggesting that BITC promotes cell proliferation of neonatal cardiomyocytes in a  
45 dose-dependent manner. Next, in an attempt to identify the target of BITC, we examined  
46 cyclin-dependent kinases (CDKs) because a previous study revealed that CDKs are important for  
47 cardiomyocyte proliferation<sup>4</sup>. Phosphorylated CDK1 in myocardial nuclei was increased in the  
48 BITC-administered heart at P7, indicating that BITC induces the activation of CDK1, which may  
49 well contribute to cell cycle progression. Furthermore, after treatment with 50  $\mu$ M BITC, about 70%  
50 of neonatal murine ventricular cardiomyocytes (NMVCs) were positive for pH3 compared with  
51 control (Figure C). Similarly, the same treatment with BITC on human iPS cell-derived  
52 cardiomyocytes (hiPSC) resulted in a tendency toward increased cell proliferation compared with  
53 control, although this enhanced proliferation was not statistically significant, most likely due to a  
54 variability among hiPSC batches (Figure C). These results indicate that BITC directly induces cell  
55 proliferation in cardiomyocytes, rather than via an indirect systemic effect.

56 Based on these results, we hypothesize that BITC treatment enables heart regeneration  
57 after myocardial infarction (MI) through enhanced cardiomyocyte proliferation. To test this  
58 hypothesis, we induced MI in P7 mice by permanent ligation of the left anterior descending coronary  
59 artery (LAD), and subsequently administered 20 mg/kg/day of BITC or control DMSO (Figure D,  
60 upper panel) from P8 to P14. At P28, BITC-treated mice showed significantly recovered ejection  
61 fraction (EF) as well as significantly decreased fibrotic scar compared with DMSO-treated mice  
62 (Figure D), suggesting that BITC administration induces cardiomyocyte proliferation, thereby  
63 allowing heart regeneration after MI in neonatal mice even after the regenerative period. From a  
64 therapeutic standpoint, it is important to know whether cell cycle reentry is induced by BITC  
65 administration in the adult heart. In order to evaluate the effect of BITC treatment on adult  
66 cardiomyocytes, we administered 20 mg/kg/day of BITC intraperitoneally to 2-month-old ICR mice  
67 for 14 days. In parallel, we placed these mice in a 10% O<sub>2</sub> environment based on findings from a  
68 previous study showing that a hypoxic environment aids cell cycle reentry in the adult heart<sup>5</sup>.  
69 pH3-positive cardiomyocytes were almost absent in the DMSO- or BITC-treated heart under the  
70 normal oxygen condition, nor were they present in the DMSO-injected heart in the 10% O<sub>2</sub> condition  
71 in consistent with previous findings (Figure E). In contrast, pH3-positive cardiomyocytes were  
72 significantly increased after BITC administration in the hypoxic environment (Figure E), indicating

73 that a combination of BITC administration and mild hypoxia exposure induces cell cycle reentry in  
74 the adult heart.

75 Taken together, our data reveal a beneficial effect of BITC on heart regeneration. BITC  
76 treatment enhances cardiomyocyte proliferation through the activation of CDK1 in the neonatal heart.  
77 In addition, BITC administration in combination with mild hypoxia in adult mice is sufficient to  
78 induce cardiomyocyte cell cycle reentry. The present study suggests that pharmacological activation  
79 of the CDK pathway with BITC concurrently with the activation of hypoxia-related signaling  
80 pathways may enable researchers to establish a novel strategy to induce cardiac regeneration in  
81 patients with heart disease.

82

### 83 **Figure legends**

84 (A) To quantify the number of pH3-positive cardiomyocytes, BITC- (SIGMA 252492, 20 mg/kg) or  
85 DMSO-administered heart sections were stained with pH3 (green, Thermo Fisher 06-570,  
86 1:100) and cardiac troponin T (cTnT, red, Thermo Fisher MS295P, 1:100) antibodies (N=3  
87 each).

88 (B) To quantify the number of pCDK1-positive cardiomyocyte nuclei, we used  
89 immunofluorescence of pCDK1 (red, abcam ab201008, 1:400) and cTnT (green) in BITC- or  
90 DMSO-administered heart at P7 (N=3 each).

91 (C) Primary culture of NMVCs (left) and hiPSC (right) were treated with 50  $\mu$ M BITC or DMSO,  
92 and the number of pH3-positive cardiomyocytes was quantified.

93 (D) After MI surgery at P7, BITC or DMSO was administered intraperitoneally once a day from P8  
94 to P14, and the ejection fraction (EF) was measured by echocardiography blindly at P28 (top  
95 and bottom left panel). Representative images of the histological sections of MI heart stained  
96 with Masson's trichrome staining (SCY TRM-1) and quantification of fibrotic area are shown  
97 (N=3 each).

98 (E) Adult ICR mice were exposed to 10 % O<sub>2</sub> or normal conditions and injected with BITC or  
99 DMSO once a day for two weeks. pH3 positive cardiomyocytes were quantified as shown in the  
100 right panel.

101 All protocols were approved by the Institutional Animal Care and Use Committee of RIKEN Kobe  
102 Branch. All experiments were performed on age-matched mice. Data are means  $\pm$  SEM, the *P* values  
103 were determined with student's *t* test, and one-way ANOVA was applied for multiple comparison.  
104 All scale bars represent 20  $\mu$ m.

105

### 106 **Acknowledgement**

107 We thank RIKEN BDR Laboratory for Animal Resources and Genetic Engineering for animal  
108 husbandry.

109

110 **Sources of Funding**

111 This work was supported by grants from Japan Society for the Promotion of Science (KAKENHI  
112 17H05083, 19K226290, and 20H03680), the PRIME program of the Japan Agency for Medical  
113 Research and Development, Takeda Science Foundation, Uehara Memorial Foundation, Japanese  
114 Circulation Society, Senri Life Science Foundation, Princess Takamatsu Cancer Research Fund,  
115 Mitsubishi Foundation, Bristol-Myers Squibb, Mochida Memorial Foundation, and The Naito  
116 Foundation, a RIKEN CDB/BDR intramural grant to W.K.; and the RBOC funding program  
117 Kakehashi to A.S..

118

- 119 1. Soonpaa MH, Kim KK, Pajak L, Franklin M, Field LJ. Cardiomyocyte dna synthesis  
120 and binucleation during murine development. *Am J Physiol.* 1996;271:H2183-2189
- 121 2. Sakaguchi A, Kimura W. Metabolic regulation of cardiac regeneration: Roles of  
122 hypoxia, energy homeostasis, and mitochondrial dynamics. *Curr Opin Genet Dev.*  
123 2021;70:54-60
- 124 3. Akagi K, Sano M, Ogawa K, Hirose M, Goshima H, Shirai T. Involvement of toxicity  
125 as an early event in urinary bladder carcinogenesis induced by phenethyl  
126 isothiocyanate, benzyl isothiocyanate, and analogues in f344 rats. *Toxicol Pathol.*  
127 2003;31:388-396
- 128 4. Mohamed TMA, Ang YS, Radzinsky E, Zhou P, Huang Y, Elfenbein A, Foley A, Magnitsky  
129 S, Srivastava D. Regulation of cell cycle to stimulate adult cardiomyocyte  
130 proliferation and cardiac regeneration. *Cell.* 2018;173:104-116.e112
- 131 5. Nakada Y, Canseco DC, Thet S, Abdisalaam S, Asaithamby A, Santos CX, Shah AM, Zhang  
132 H, Faber JE, Kinter MT, Szweda LI, Xing C, Hu Z, Deberardinis RJ, Schiattarella  
133 G, Hill JA, Oz O, Lu Z, Zhang CC, Kimura W, Sadek HA. Hypoxia induces heart  
134 regeneration in adult mice. *Nature.* 2017;541:222-227

135

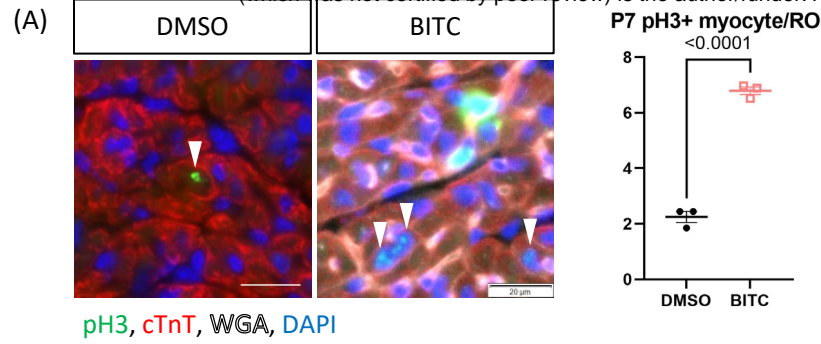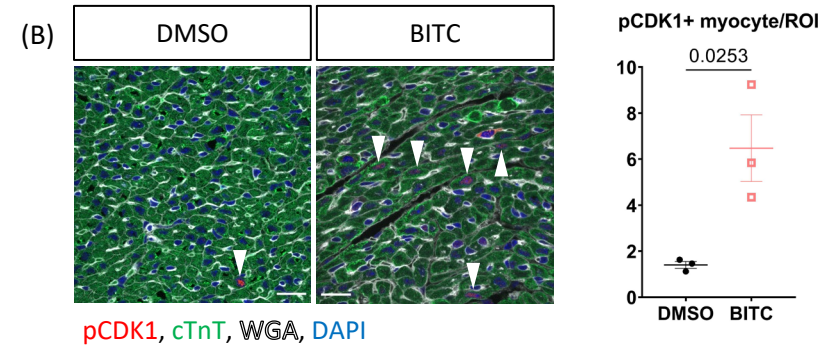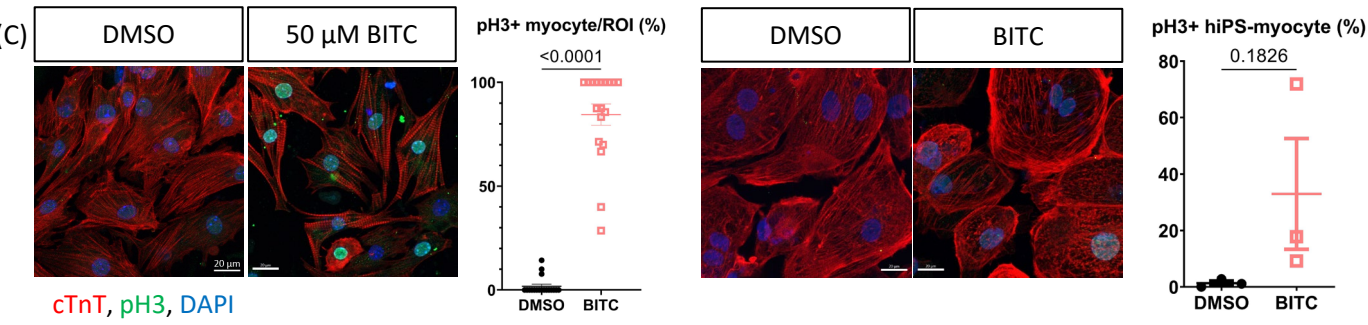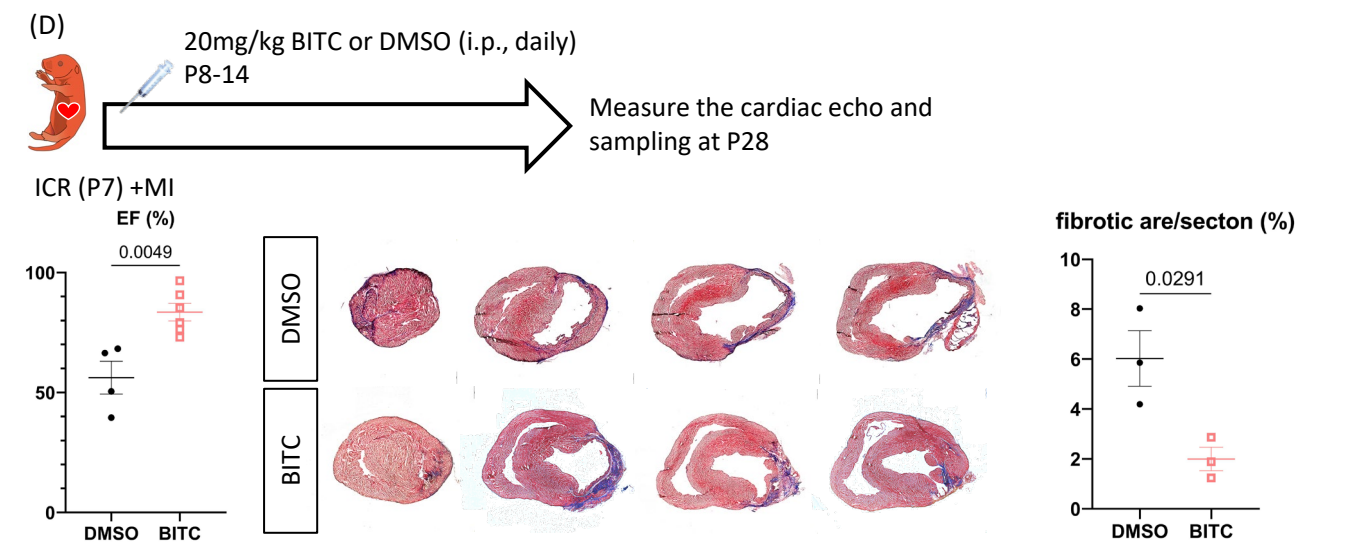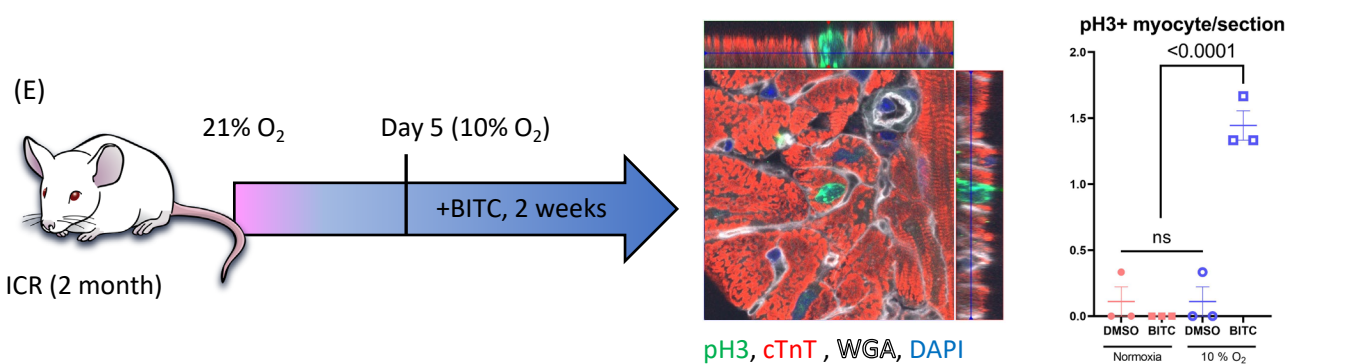

Source: https://biorxiv.org/content/10.1101/2021.09.08.459197v1.full.pdf
